# Supplementary material for: A facile one-pot strategy for preparation of small polymer nanoparticles by self-crosslinking of amphiphilic block copolymers containing acyl azide groups in aqueous media
Source: Royal Society of Chemistry journal article supplement (doi:10.1039/c0sm01132k), 2011-01-01
Supplement: c0sm01132k.pdf [file c0sm01132k.pdf]

## Supplementary Information

# A facile one-pot strategy for preparation of small polymer nanoparticles by self-crosslinking of amphiphilic block copolymers containing acyl azide groups in aqueous media

Haiting Zheng<sup>a</sup>, Xiaodong Ye<sup>b</sup>, Hu Wang<sup>a</sup>, Lifeng Yan<sup>b</sup>, Ruke Bai<sup>a,\*</sup>, Wanqun Hu<sup>c</sup>

<sup>a</sup> CAS Key Laboratory of Soft Matter Chemistry, Department of Polymer Science and Engineering, University of Science and Technology of China, Hefei, Anhui, 230026, People's Republic of China

<sup>b</sup> Department of Chemical Physics, University of Science and Technology of China, Hefei, Anhui, 230026, People's Republic of China

<sup>c</sup> School of Chemistry and Materials Science, University of Science and Technology of China, Hefei, Anhui, 230026, People's Republic of China

\* Corresponding author. E-mail: [bairk@ustc.edu.cn](mailto:bairk@ustc.edu.cn). Fax: 0086 551 3631760. Tel: 0086 551 3600722

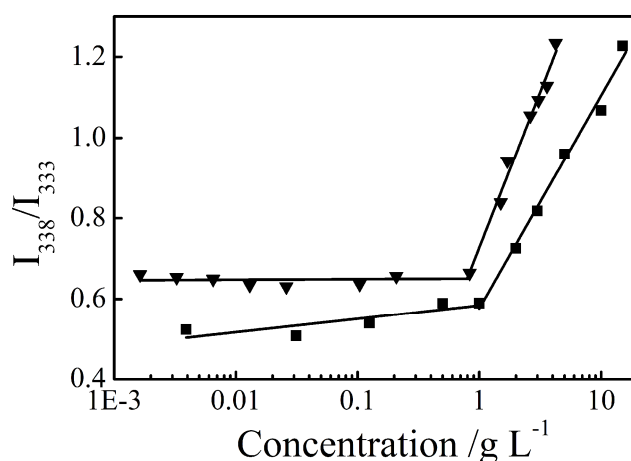

Fig. S1 Plot of  $I_{338}/I_{333}$  as a function of the copolymers concentration, CMC for N34A6 (solid triangle) is 0.89 mg/mL, for N113A6 (solid rectangle) is 0.99 mg/mL, [Pyrene] =  $1 \times 10^{-7}$  mol/L

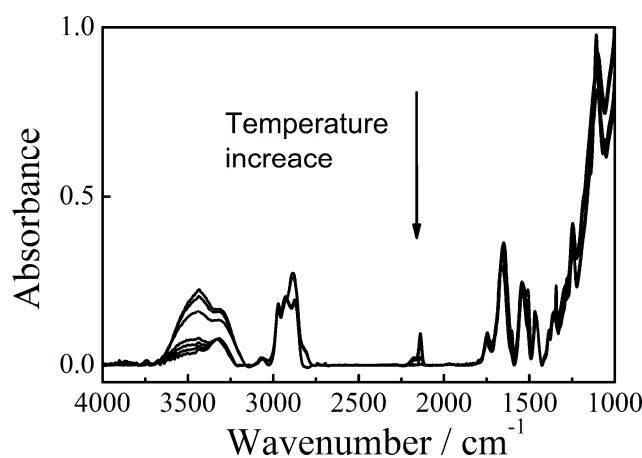

Fig. S2 FT-IR spectra of copolymer N34A6 with the temperature increasing slowly.

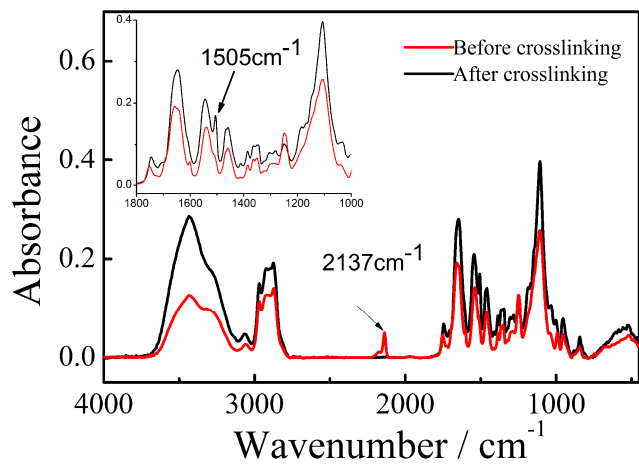

Fig. S3 FT-IR spectra of copolymer N34A6 before crosslinking and the corresponding crosslinked nanoparticles.

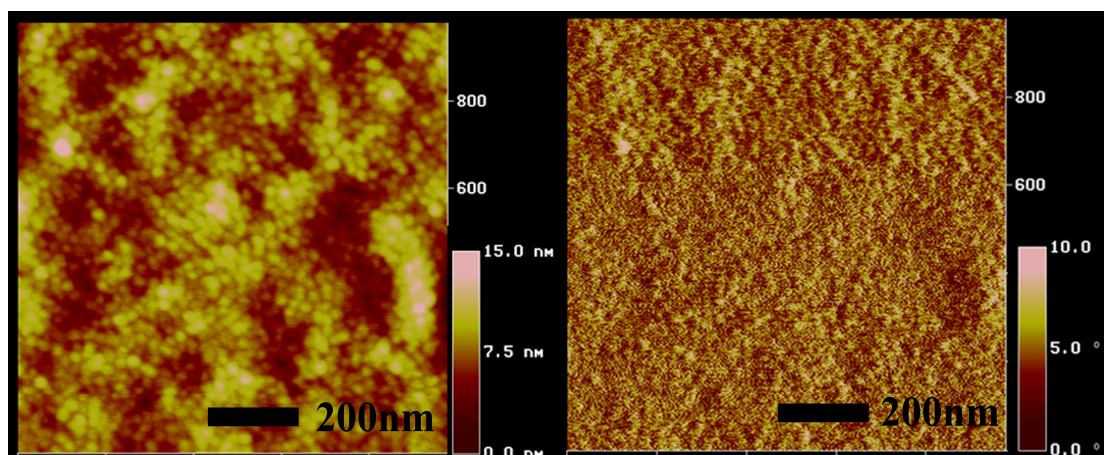

Fig. S4 AFM images of the micelles formed from copolymer N34A6 after slow heating to 80  $^{\circ}\text{C}$  in water (1 mg/mL), the left is height image and the right is phase image.
